# Supplementary material for: Lineage-Specific Epigenomic and Genomic Activation of Oncogene HNF4A Promotes Gastrointestinal Adenocarcinomas
Source: Oxford University Press journal article supplement (doi:10.1158/0008-5472.can-20-0390), 2020-04-24
Supplement: 00085472can200390-sup-236808_2_supp_6230506_q8sxhy.xlsx [file 00085472can200390-sup-236808_2_supp_6230506_q8sxhy.xlsx]

## Sheet: Sheet1
Enriched Interleukin signaling pathway members			Eso26	Caco2	GP5d	LoVo	IM95	IST-1	KATO-III	NUGC-4	OCUM-1	SNU16	YCC3
Gene Symbol	Type	ID	HNF4A binding	HNF4A binding	HNF4A binding	HNF4A binding	HNF4A binding	HNF4A binding	HNF4A binding	HNF4A binding	HNF4A binding	HNF4A binding	HNF4A binding
LYN	protein_coding	NM_002350	Yes	No	No	No	Yes	Yes	No	Yes	No	Yes	Yes
IL32	protein_coding	NM_001012631	Yes	Yes	Yes	Yes	Yes	Yes	Yes	Yes	Yes	Yes	Yes
IL4R	protein_coding	NM_000418	Yes	Yes	Yes	Yes	Yes	Yes	Yes	Yes	Yes	Yes	Yes
ANXA2	protein_coding	NM_001002857	Yes	Yes	Yes	No	Yes	Yes	Yes	Yes	Yes	Yes	Yes
CCL20	protein_coding	NM_001130046	Yes	Yes	Yes	Yes	Yes	Yes	Yes	Yes	Yes	Yes	Yes
ELK1	protein_coding	NM_001114123	Yes	No	No	No	Yes	Yes	Yes	Yes	Yes	Yes	No
DUSP6	protein_coding	NM_001946	Yes	No	No	No	Yes	Yes	Yes	Yes	Yes	Yes	Yes
CRKL	protein_coding	NM_005207	Yes	Yes	No	No	Yes	Yes	Yes	Yes	Yes	Yes	Yes
CCND1	protein_coding	NM_053056	Yes	Yes	No	No	Yes	Yes	Yes	Yes	Yes	Yes	Yes
RHOU	protein_coding	NM_021205	Yes	Yes	Yes	Yes	Yes	Yes	Yes	Yes	Yes	Yes	Yes
IL6ST	protein_coding	NM_001190981	Yes	Yes	Yes	No	Yes	Yes	Yes	Yes	Yes	Yes	Yes
IL6R	protein_coding	NM_000565	Yes	Yes	Yes	Yes	Yes	Yes	Yes	Yes	Yes	Yes	Yes
CRKL	protein_coding	NM_005207	Yes	No	No	No	Yes	Yes	Yes	Yes	Yes	Yes	Yes
SOCS1	protein_coding	NM_003745	Yes	No	No	No	Yes	No	Yes	Yes	Yes	No	Yes
